# Supplementary material for: Agroforestry Systems of Cocoa (Theobroma cacao L.) in the Ecuadorian Amazon
Source: MDPI journal article supplement (doi:10.3390/f15010195), 2024-01-18
Supplement: s1 [file s1]

**Table S1.** Mean values for fruit yield determined for the interaction Agroforestry systems x Production cycle.

| Agroforestry System                            | Production Cycle (years) | Yield (kg ha <sup>-1</sup> ) |
|------------------------------------------------|--------------------------|------------------------------|
| <i>E. poeppigiana</i>                          | 2018                     | 819.3                        |
| <i>C. cateniformis</i> + <i>E. poeppigiana</i> |                          | 852.5                        |
| <i>C. cateniformis</i>                         |                          | 700.1                        |
| <i>B. gasipaes</i>                             |                          | 573.2                        |
| Monoculture                                    |                          | 540.7                        |
| <i>E. poeppigiana</i>                          | 2019                     | 456.4                        |
| <i>C. cateniformis</i> + <i>E. poeppigiana</i> |                          | 456.7                        |
| <i>C. cateniformis</i>                         |                          | 410.6                        |
| <i>B. gasipaes</i>                             |                          | 325.3                        |
| Monoculture                                    |                          | 308.7                        |
| <i>E. poeppigiana</i>                          | 2020                     | 481.4                        |
| <i>C. cateniformis</i> + <i>E. poeppigiana</i> |                          | 527.8                        |
| <i>C. cateniformis</i>                         |                          | 442.9                        |
| <i>B. gasipaes</i>                             |                          | 421.7                        |
| Monoculture                                    |                          | 451.4                        |
| <i>E. poeppigiana</i>                          | 2021                     | 585.7                        |
| <i>C. cateniformis</i> + <i>E. poeppigiana</i> |                          | 612.3                        |
| <i>C. cateniformis</i>                         |                          | 517.9                        |
| <i>B. gasipaes</i>                             |                          | 440.1                        |
| Monoculture                                    |                          | 433.6                        |
| <i>E. poeppigiana</i>                          | 2022                     | 533.6                        |
| <i>C. cateniformis</i> + <i>E. poeppigiana</i> |                          | 570.1                        |
| <i>C. cateniformis</i>                         |                          | 480.4                        |
| <i>B. gasipaes</i>                             |                          | 442.5                        |
| Monoculture                                    |                          | 430.9                        |

**Table S2.** Mean values for stored C determined for the interaction Agroforestry systems x Production cycle.

| Agroforestry System                            | Production years | Total stored C<br>(t ha <sup>-1</sup> ) |
|------------------------------------------------|------------------|-----------------------------------------|
| <i>E. poeppigiana</i>                          | 2018             | 38.3                                    |
| <i>C. cateniformis</i> + <i>E. poeppigiana</i> |                  | 37.0                                    |
| <i>C. cateniformis</i>                         |                  | 33.3                                    |
| <i>B. gasipaes</i>                             |                  | 30.0                                    |
| Monoculture                                    |                  | 39.6                                    |
| <i>E. poeppigiana</i>                          | 2019             | 34.2                                    |
| <i>C. cateniformis</i> + <i>E. poeppigiana</i> |                  | 33.0                                    |
| <i>C. cateniformis</i>                         |                  | 26.4                                    |
| <i>B. gasipaes</i>                             |                  | 26.2                                    |
| Monoculture                                    |                  | 30.4                                    |
| <i>E. poeppigiana</i>                          | 2020             | 39.9                                    |
| <i>C. cateniformis</i> + <i>E. poeppigiana</i> |                  | 34.1                                    |
| <i>C. cateniformis</i>                         |                  | 29.0                                    |
| <i>B. gasipaes</i>                             |                  | 30.1                                    |
| Monoculture                                    |                  | 35.2                                    |
| <i>E. poeppigiana</i>                          | 2021             | 51.2                                    |
| <i>C. cateniformis</i> + <i>E. poeppigiana</i> |                  | 43.6                                    |
| <i>C. cateniformis</i>                         |                  | 37.2                                    |
| <i>B. gasipaes</i>                             |                  | 35.9                                    |
| Monoculture                                    |                  | 43.0                                    |
| <i>E. poeppigiana</i>                          | 2022             | 46.4                                    |
| <i>C. cateniformis</i> + <i>E. poeppigiana</i> |                  | 47.5                                    |
| <i>C. cateniformis</i>                         |                  | 44.7                                    |
| <i>B. gasipaes</i>                             |                  | 41.6                                    |
| Monoculture                                    |                  | 49.9                                    |
